# Supplementary material
Source: PubMed Central journal article supplement (PMC5686612)
Supplement: JB.00497-17_zjb999094592s1.pdf [file JB.00497-17_zjb999094592s1.pdf]

1  
2  
3  
4  
5  
6  
7  
8  
9  
10  
11  
12  
13  
14  
15  
16  
17  
18  
19  
20  
21  
22  
23

**SUPPLEMENTAL INFORMATION**

Submitted to: Journal of Bacteriology  
August 11, 2017

**Title:** RgpF is required for maintenance of stress tolerance and virulence in  
*Streptococcus mutans*.

Kovacs, C. J.<sup>1</sup>, Faustoferri, R. C.<sup>2</sup>, Quivey Jr., R. G.<sup>1, 2, #</sup>

<sup>1</sup> Department of Microbiology & Immunology, Box 672  
<sup>2</sup> Center for Oral Biology, Box 611  
University of Rochester School of Medicine and Dentistry  
Rochester, NY 14642

#Corresponding author: Robert G. Quivey, Jr.  
Department of Microbiology & Immunology and  
Center for Oral Biology  
University of Rochester School of Medicine &  
Dentistry  
Rochester, NY 14642  
Telephone: 585-275-0382  
Email: Robert\_Quivey@urmc.rochester.edu

24 SUPPLEMENTAL METHODS

25 **Quantitative real-time PCR.** RNA was extracted from three independent  
26 cultures grown at steady state conditions of pH 7 and pH 5, according to  
27 previously described methods (1). The High Capacity cDNA Reverse  
28 Transcription kit (Applied Biosystems, Carlsbad, CA) was used to generate cDNA  
29 from RNA samples using random primers. Specific primers to *rgpF* were used  
30 (RT-forward: 5'-GCGAGATGGAATGGTCTT-3' and RT-reverse: 5'-  
31 CACGGTTGTTGGTCAATC-3') with Power SYBR Green Master Mix (Applied  
32 Biosystems) and reactions were carried out in a Step One Plus Real-time PCR  
33 System (Applied Biosystems). The mRNA copy number was quantified based on  
34 a standard curve of PCR products for specific gene targets.

35

36 **Growth curves.** Growth rates were determined using a BioScreen C plate  
37 reader (Growth Curves USA, Piscataway, NJ). Overnight cultures of *S. mutans*  
38 UA159,  $\Delta$ *rgpF*, and *rgpF*<sup>+</sup> strains grown in TY medium supplemented with 1%  
39 (w/v) glucose were subcultured 1:20 (UA159 and *rgpF*<sup>+</sup>) or 1:10 ( $\Delta$ *rgpF*) into  
40 fresh medium and incubated at 37°C in a 5% (v/v) CO<sub>2</sub>/95% air atmosphere until  
41 cultures reached an OD<sub>600</sub> of 0.3. A 10 µL aliquot was used to inoculate wells of  
42 a microtiter plate containing 300 µL test medium. Assays were performed at 37°C  
43 and OD<sub>600</sub> was continually read at 30 minute intervals following 10 seconds of  
44 shaking at medium amplitude. Generation times were calculated using the  
45 formula  $0.3/[(N-N_0)/(T-T_0)]$ , where N represents the mean OD<sub>600</sub> value at the end  
46 of exponential phase and N<sub>0</sub> represents the mean OD<sub>600</sub> at the beginning of

47 exponential phase. T and T<sub>0</sub> refer to the times in minutes that correspond to the  
48 OD<sub>600</sub> values for N and N<sub>0</sub>, respectively. Statistical significance (†;  $p \leq 0.02$ ) was  
49 determined by pairwise comparison using Student's *t*-test, comparing  $\Delta rgpF$  to  
50 both UA159 and *rgpF*<sup>+</sup>.

51

52 **Interspecies competition spot assay controls.** *Streptococcus gordonii* DL1  
53 and *Streptococcus sanguinis* 10904, members of the peroxigenic streptococcal  
54 group, were used as primary cultures in peroxigenic competition assays (2).  
55 Bacteria were grown overnight in BHI medium at 37°C in a 5% (v/v) CO<sub>2</sub>/95% air  
56 atmosphere, then subcultured into fresh BHI medium until cultures reached an  
57 OD<sub>600</sub> of 0.4. An 8.0 μL aliquot was then spotted onto pre-warmed BHI agar and  
58 incubated overnight anaerobically at 37°C. Anaerobic conditions were achieved  
59 by utilizing a GasPak jar apparatus containing a BD GasPak EZ Anaerobe  
60 Container System sachet (BD, Sparks, MD, USA) to deplete oxygen gas within  
61 the sealed vessel, verified by the inclusion of a dry anaerobic indicator (BD  
62 GasPak). Concurrently, competing bacteria were similarly grown overnight and  
63 subcultured (i.e. at 37°C in a 5% (v/v) CO<sub>2</sub>/95% air atmosphere), and an 8.0 μL  
64 aliquot was spotted immediately adjacent to the primary spot. Plates were then  
65 returned to GasPak jars for anaerobic outgrowth. A *S. mutans smx* mutant strain  
66 (SMU.1649; responsible for production of the base-excision repair enzyme Smx)  
67 was included as a positive control for oxidative stress susceptibility (3).

68 Separately, acidogenic competition assays were performed using *S.*  
69 *mutans* UA159 and  $\Delta rgpF$  as primary cultures, and both primary and competing

70 cultures were grown as described above. Spots were plated onto BHI agar  
71 medium buffered to pH 7.0 using 50 mM KPO<sub>4</sub> buffer to control for acidification of  
72 agar and incubated at 37°C in a 5% (v/v) CO<sub>2</sub>/95% air atmosphere.

73 Data is shown as representative images of outgrowth inhibition  
74 from three independent experiments performed in triplicate.

75

76

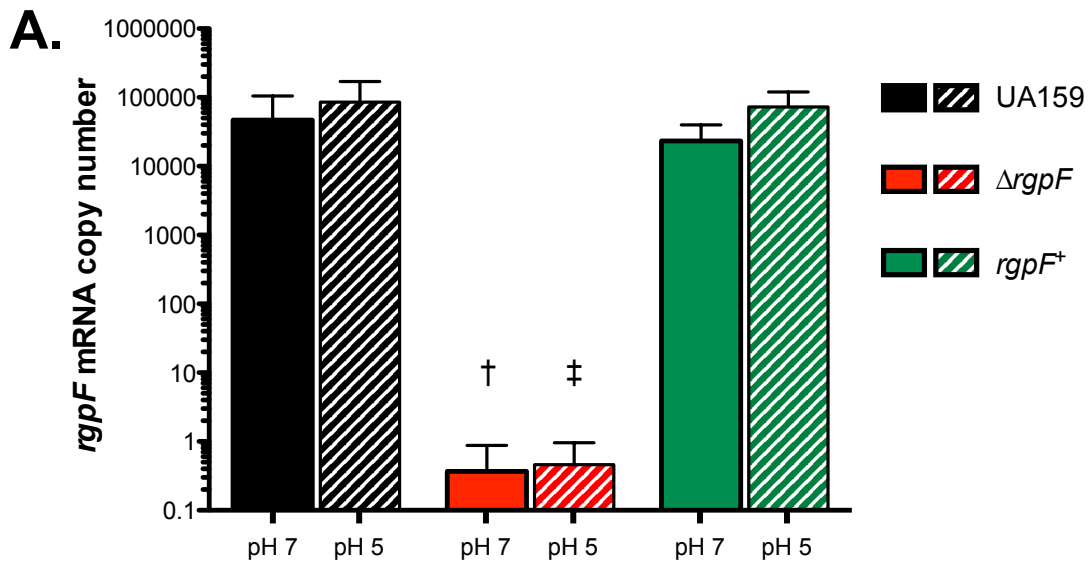

77  
78  
79

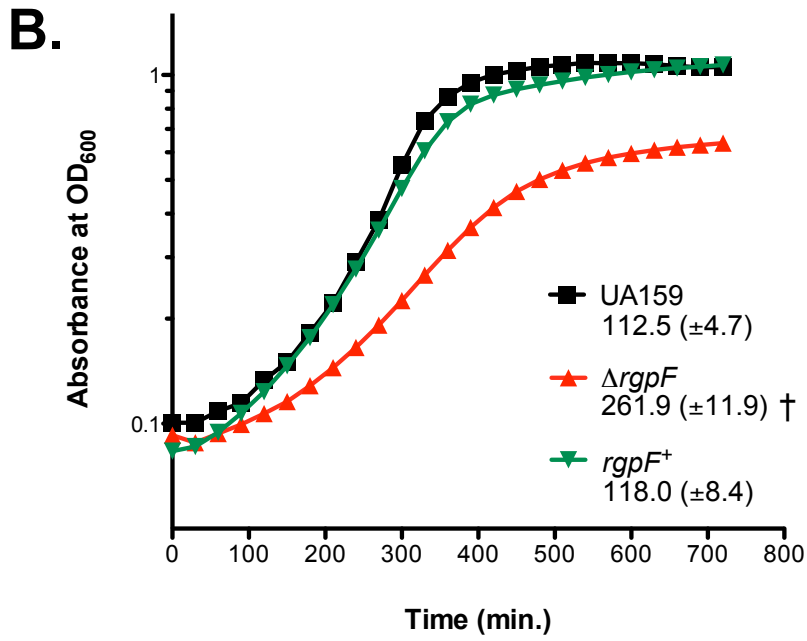

80  
81

82 **Figure S1. Complementation of *rgpF* restores expression and growth.**

83 (Panel A) Transcription of *rgpF* was determined by qRT-PCR using RNA isolated  
84 from cultures of *S. mutans* UA159 (black bars),  $\Delta rgpF$  (red bars) and *rgpF*<sup>+</sup>  
85 (green bars) grown in continuous culture to steady-state pH values of 7 (solid  
86 bars) and 5 (hashed bars). Samples from three independent chemostat cultures  
87 were measured in triplicate and are represented as mean values  $\pm$  SD. (Panel  
88 B) Cultures of *S. mutans* UA159 (■),  $\Delta rgpF$  (▲) and *rgpF*<sup>+</sup> (▼), were grown  
89 overnight in TY + 1% (w/v) glucose medium. The overnight cultures were used to  
90 inoculate fresh TY + 1% (w/v) glucose and cultures were grown to OD<sub>600</sub> ~ 0.3,  
91 then used to inoculate a plate containing fresh medium. Growth was assessed in  
92 a Bioscreen C plate reader by measuring OD<sub>600</sub>. Data are shown as mean values  
93  $\pm$  SD, with calculated doubling times  $\pm$  SD depicted in legend (n=10). Statistical  
94 significance (†;  $p \leq 0.02$ ) was determined by pairwise comparison using  
95 Student's *t*-test, comparing  $\Delta rgpF$  to both UA159) and *rgpF*<sup>+</sup>.

96

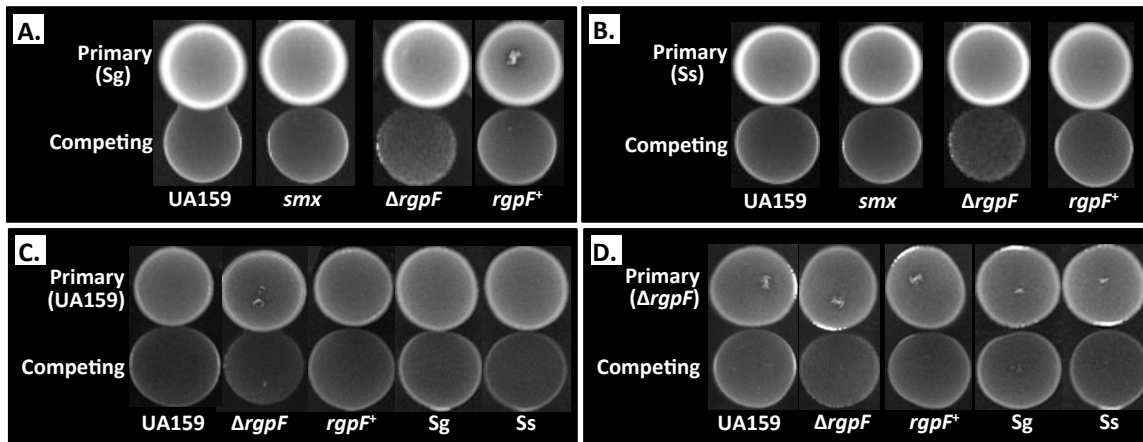

97  
98  
99

100 **Figure S2. Interspecies competition assay controls.** Competitive spot plating  
 101 was performed under anaerobic conditions for oxidative stress control  
 102 experiments using *S. gordonii* DL-1 (Sg) (Panel A) and *S. sanguinis* 10904 (Ss)  
 103 (Panel B) as primary spots. *S. mutans* UA159 (Panel C) and *S. mutans*  $\Delta rgpF$   
 104 (Panel D) were used as primary spots in acidic stress control experiments where  
 105 spots were plated on BHI agar medium buffered to neutral pH using 50 mM  $KPO_4$   
 106 buffer. The *S. mutans* strain *smx* was included as a positive oxidative stress-  
 107 sensitive control and carries a mutation in SMU.1649 encoding a base excision  
 108 repair enzyme (3).  
 109

110 SUPPLEMENTAL REFERENCES

111

- 112 1. **Abranches J, Candella MM, Wen ZT, Baker HV, Burne RA.** 2006.  
113 Different roles of EIIAB<sup>Man</sup> and EII<sup>Glc</sup> in regulation of energy metabolism,  
114 biofilm development, and competence in *Streptococcus mutans*. J  
115 Bacteriol **188**:3748-3756.
- 116 2. **Kreth J, Merritt J, Shi W, Qi F.** 2005. Competition and coexistence  
117 between *Streptococcus mutans* and *Streptococcus sanguinis* in the dental  
118 biofilm. J Bacteriol **187**:7193-7203.
- 119 3. **Faustoferri RC, Hahn K, Weiss K, Quivey RG, Jr.** 2005. Smx nuclease  
120 is the major, low-pH-inducible apurinic/apyrimidinic endonuclease in  
121 *Streptococcus mutans*. J Bacteriol **187**:2705-2714.  
122
